# Supplementary material for: Heteroatom number-dependent cluster frameworks in structurally comparable Pd–Au nanoclusters
Source: Royal Society of Chemistry journal article supplement (doi:10.1039/d4nr05222f), 2025-01-01
Supplement: d4nr05222f1.pdf [file d4nr05222f1.pdf]

## ***Supplementary Information***

### **Heteroatom Number-Dependent Cluster Frameworks in Structurally Comparable Pd-Au Nanoclusters**

Ziwei Fu,<sup>#a</sup> Chen Li,<sup>#a</sup> Ye Tian,<sup>a</sup> Fakhari Alam,<sup>a</sup> Daqiao Hu,<sup>a</sup> Honglei Shen,<sup>\*a</sup> Xi Kang,<sup>\*a</sup> Manzhou Zhu<sup>a</sup>

<sup>a</sup>Department of Chemistry and Centre for Atomic Engineering of Advanced Materials, Key Laboratory of Structure and Functional Regulation of Hybrid Materials of Ministry of Education, Anhui Province Key Laboratory of Chemistry for Inorganic/Organic Hybrid Functionalized Materials, Anhui University, Hefei, Anhui 230601, P. R. China.

#### ***This Supplementary Information file includes:***

Experimental Methods

Figure S1-S12

Table S1-S3

## Experimental Methods

### Materials and Reagents

All reagents were purchased from Sigma-Aldrich and used without further purification, including  $\text{HAuCl}_4 \cdot 3\text{H}_2\text{O}$  (99% metal basis),  $\text{H}_2\text{PdCl}_4$  (99% metal basis), 6-(dibutylamino)-1,3,5-triazine-2, 4-dithiol (TDT, 97%), triphenylphosphine (TPP, 99%), dichloromethane (DCM, HPLC), methanol (MeOH, HPLC), n-hexane (Hex, HPLC) and sodium borohydride ( $\text{NaBH}_4$ , 99.9%).

### Synthesis of the $\text{Pd}_1\text{Au}_{12}$ and $\text{Pd}_2\text{Au}_{12}$ nanoclusters

The  $\text{Pd}_1\text{Au}_{12}$  was synthesized using a one-pot synthetic method at 60 °C. Specifically, 0.1 mmol of  $\text{HAuCl}_4 \cdot 3\text{H}_2\text{O}$  and 0.016 mmol of  $\text{H}_2\text{PdCl}_4$  were dissolved in a mixed organic solvent (10 mL of MeOH and 10 mL of DCM). Then, 0.184 mmol of TDT and 0.382 mmol of TPP were added into the solution with vigorous stirring. The color of the solution turned to light yellow. After 30 minutes, 30 mg of  $\text{NaBH}_4$  (dissolved in 1 mL of ice water) was added to the solution, and the color of the solution turned red immediately. The reaction lasted for 10 hours. Then, the crude products were collected by centrifugation and then washed three times with hexane. The precipitate was then dissolved in  $\text{CH}_2\text{Cl}_2$  and diffused by hexane at room temperature. After five days, cubical crystals were obtained. The yield was ~65% based on the Au element (calculated from the  $\text{HAuCl}_4 \cdot 3\text{H}_2\text{O}$ ) for synthesizing the  $\text{Pd}_1\text{Au}_{12}$  nanocluster. The synthesis method of  $\text{Pd}_2\text{Au}_{12}$  was almost the same as that of  $\text{Pd}_1\text{Au}_{12}$ . The only difference was that the  $\text{Pd}_2\text{Au}_{12}$  nanocluster was synthesized at room temperature (about 25 °C). Needle-shaped crystals of  $\text{Pd}_2\text{Au}_{12}$  were obtained. The yield was ~34% based on the Au element (calculated from the  $\text{HAuCl}_4 \cdot 3\text{H}_2\text{O}$ ) for synthesizing the  $\text{Pd}_2\text{Au}_{12}$  nanocluster.

### Measurements

#### UV-vis absorption spectroscopy

All UV-vis optical absorption spectra of PdAu-bimetallic nanoclusters dissolved in DCM were recorded using an Agilent 8453 diode array spectrometer, whose background correction was made using a DCM blank.

#### ESI-MS spectrometry

ESI-MS measurements were performed by Waters XEVO G2-XS QT of the mass spectrometer. The sample was directly infused into the chamber at 5  $\mu\text{L}/\text{min}$ . For preparing the ESI samples, nanoclusters were dissolved in DCM (1 mg/mL) and diluted (v/v = 1:1) by  $\text{CH}_3\text{OH}$ .

#### XPS spectroscopy

XPS measurements were performed on a Thermo ESCALAB 250 configured with a monochromatized Al  $\text{K}\alpha$  (1486.8 eV) 150 W X-ray source, 0.5 mm circular spot size, flood gun to counter charging effects, and analysis chamber base pressure lower than  $1 \times 10^{-9}$  mbar.

#### X-Ray Crystallography

The data collection for SC-XRD of crystal samples was carried out on a Stoe Stadivari diffractometer under nitrogen flow, using graphite-monochromatized Cu  $\text{K}\alpha$  radiation ( $\lambda = 1.54186 \text{ \AA}$ ). Data reductions and absorption corrections were performed using the SAINT and SADABS programs, respectively. The structure was solved by direct methods and refined with full-matrix least squares on  $F^2$  using the SHELXTL software package. The CCDC number of  $\text{Pd}_1\text{Au}_{12}$  is 2401398. The CCDC number of  $\text{Pd}_2\text{Au}_{12}$  is 2401397.

### Electrochemical measurement

All electrochemical tests were carried out in an H-type electrolytic cell, and the two chambers were separated by Nafion 117 proton exchange membrane. Carbon paper loaded with ink reagent was used as working electrode for CO<sub>2</sub> reduction. The Ag / AgCl electrode was used as the reference electrode and the platinum electrode was used as the auxiliary electrode. The prepared **Pd<sub>1</sub>Au<sub>12</sub>** and **Pd<sub>2</sub>Au<sub>12</sub>** clusters were dissolved in a mixed solution of DMF and Nafion and dropped onto carbon paper to prepare a working electrode. The electrolyte was 0.5 M KHCO<sub>3</sub> solution. The PANNA A91 PLUS gas phase detector with FID detector was used to quantify the reactants. The CO<sub>2</sub>RR reaction was carried out for 10 min. During the reaction, the electrolyte in the cathode chamber was stirred at a speed of 600 rpm. Electrochemical impedance spectroscopy (EIS) was used to determine the uncompensated resistance at each potential before the electrochemical test, and 90 % iR correction was performed.

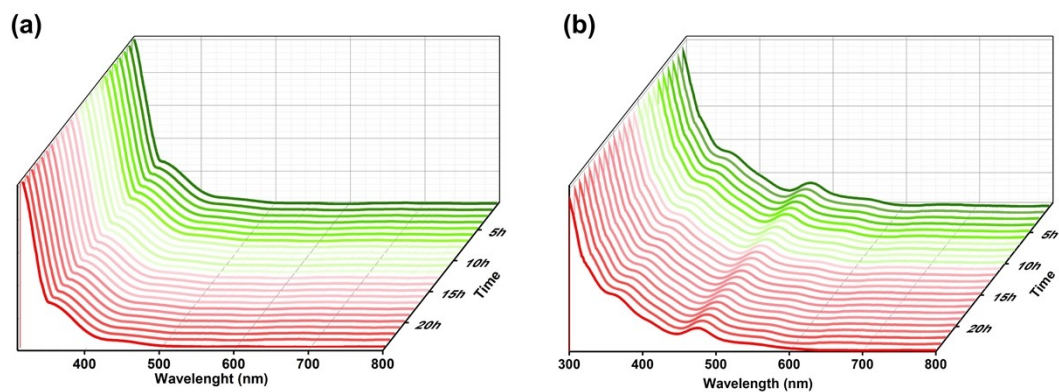

Figure S1. Time-dependent UV-vis spectra of (a)  $\text{Pd}_1\text{Au}_{12}$  and (b)  $\text{Pd}_2\text{Au}_{12}$  under ambient conditions in solution.

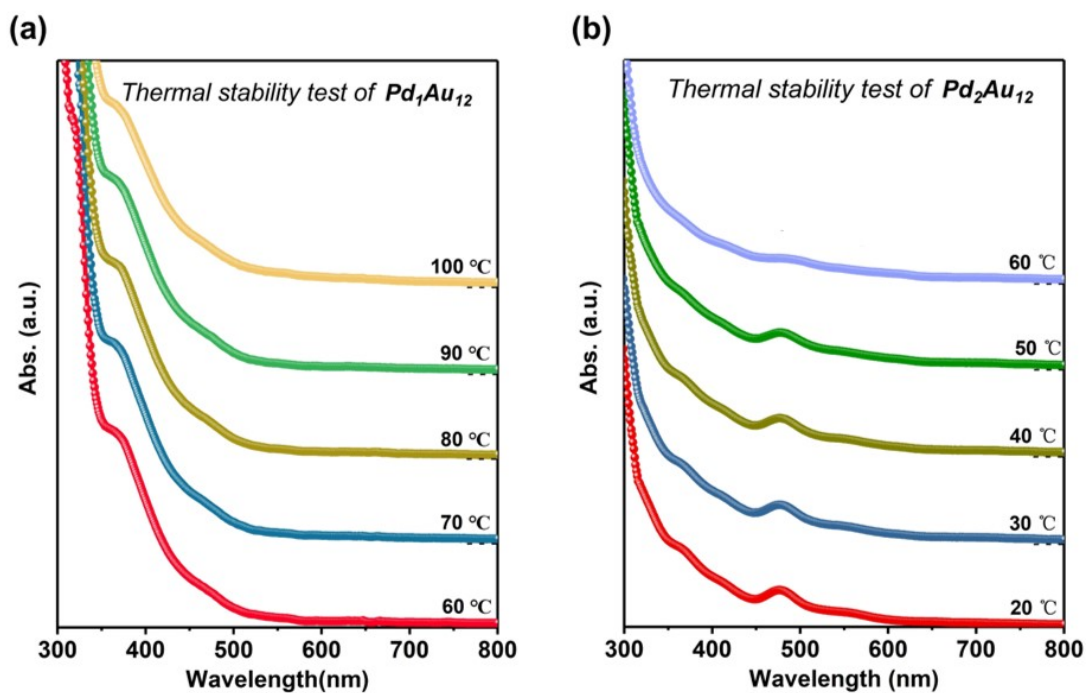

Figure S2. Thermal stability of (a)  $\text{Pd}_1\text{Au}_{12}$  and (b)  $\text{Pd}_2\text{Au}_{12}$  nanoclusters.

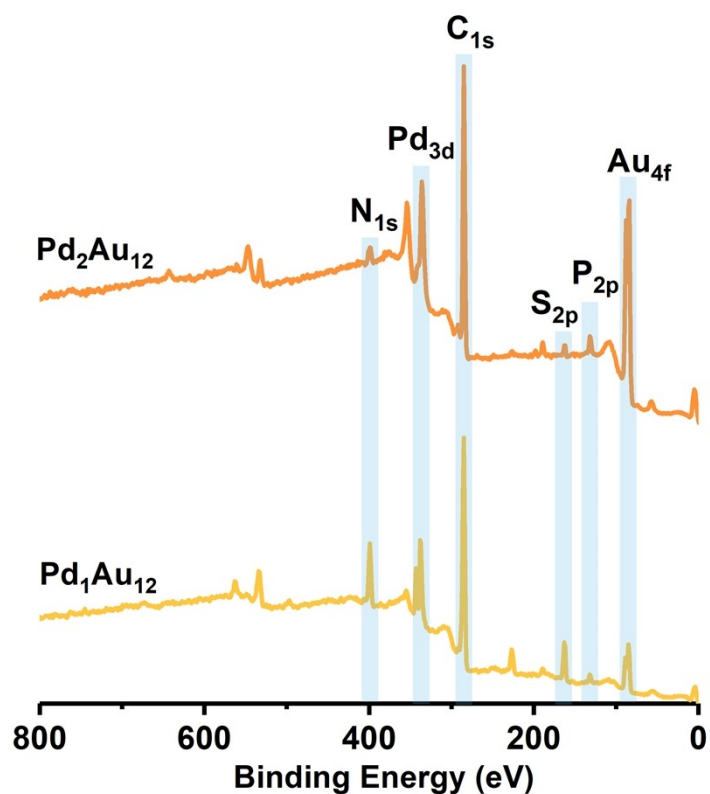

Figure S3. Full scan XPS spectra of  $\text{Pd}_1\text{Au}_{12}$  and  $\text{Pd}_2\text{Au}_{12}$ .

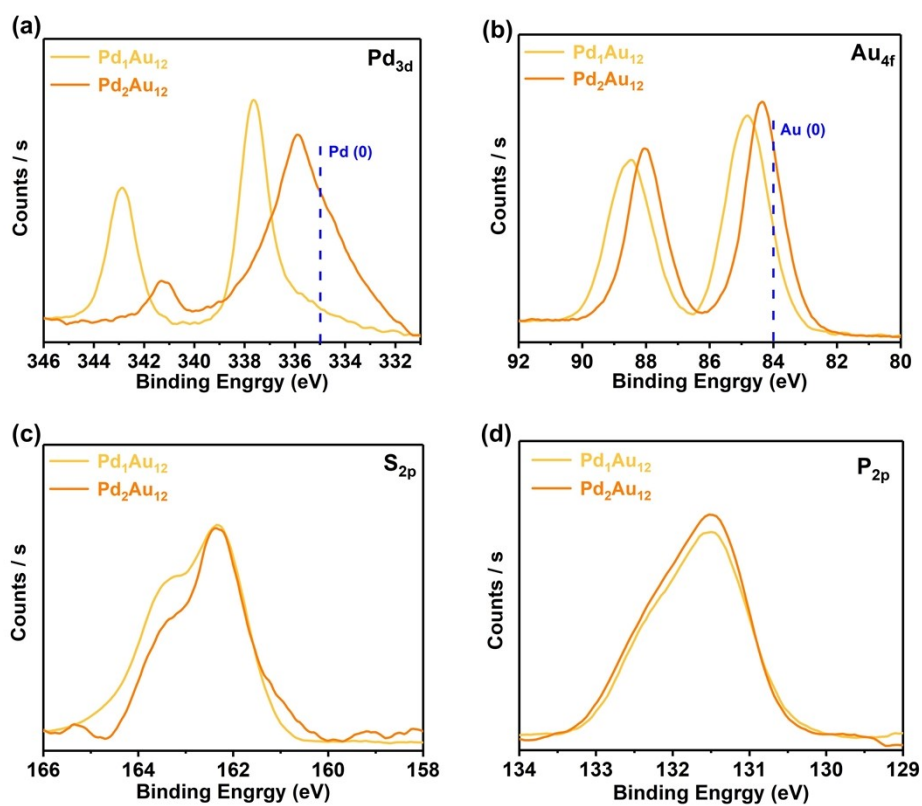

Figure S4. XPS spectra of (a)  $\text{Pd}_{3d}$ , (b)  $\text{Au}_{4f}$ , (c)  $\text{S}_{2p}$  and (d)  $\text{P}_{2p}$  of  $\text{Pd}_1\text{Au}_{12}$  and  $\text{Pd}_2\text{Au}_{12}$ .

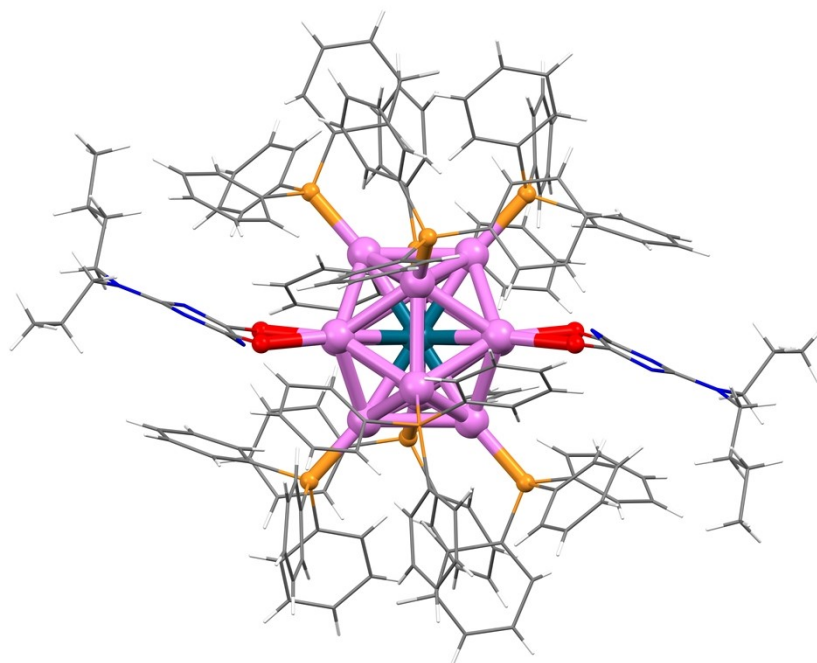

**Figure S5.** Total structure of the  $\text{Pd}_1\text{Au}_{12}(\text{TDT})_2(\text{TPP})_8$  nanocluster. Color codes: cyan = Pd, pink = Au, red = S, orange = P. The H, C and N atoms are shown in stick mode.

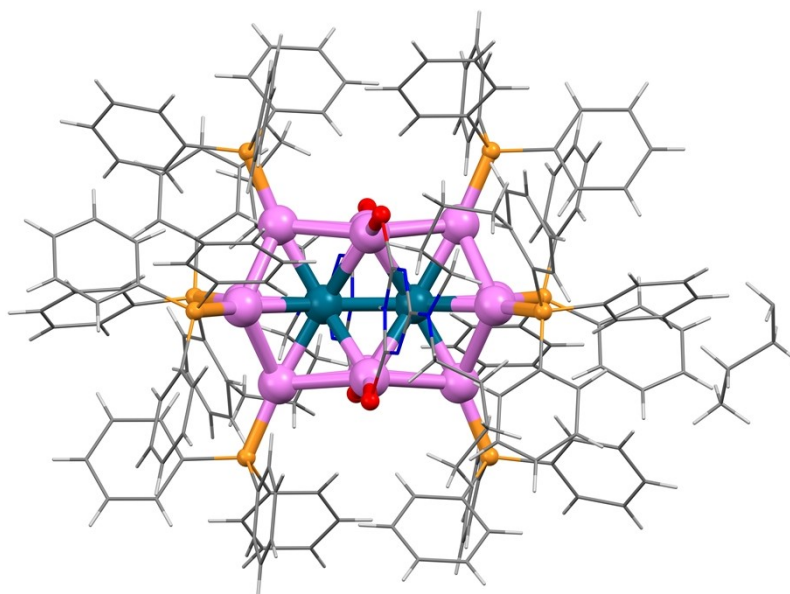

**Figure S6.** Total structure of the  $\text{Pd}_2\text{Au}_{12}(\text{TDT})_2(\text{TPP})_8$  nanocluster. Color codes: cyan = Pd, pink = Au, red = S, orange = P. The H, C and N atoms are shown in stick mode.

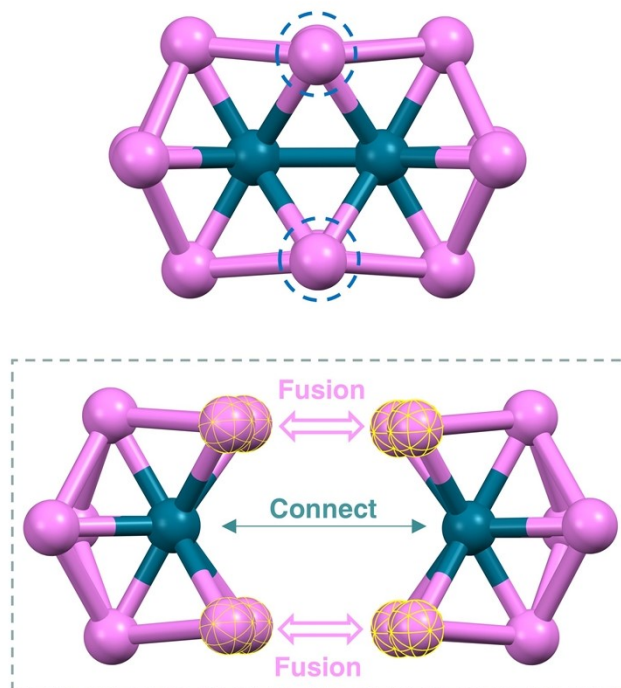

**Figure S7.** The fused mode of two  $\text{Pd}_1\text{Au}_8$  sub-framework to form the  $\text{Pd}_2\text{Au}_{12}$  structure. Color codes: cyan = Pd, pink = Au, red = S, orange = P.

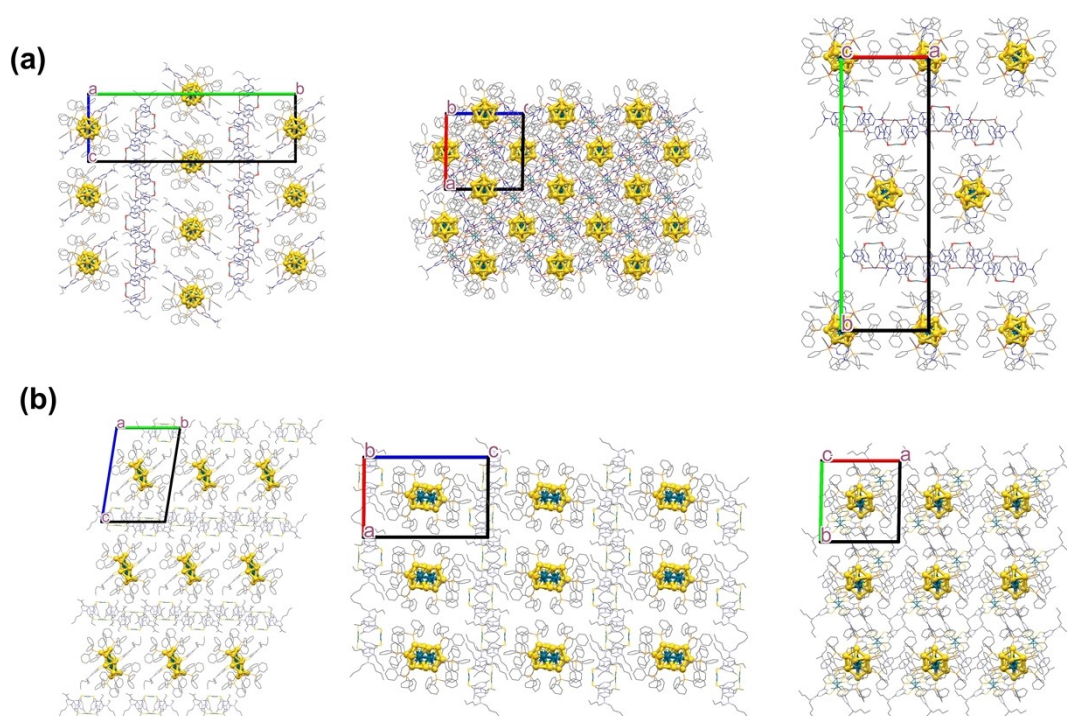

**Figure S8.** Packing models of (a)  $\text{Pd}_1\text{Au}_{12}$  and (b)  $\text{Pd}_2\text{Au}_{12}$  nanoclusters, viewed from different angles.

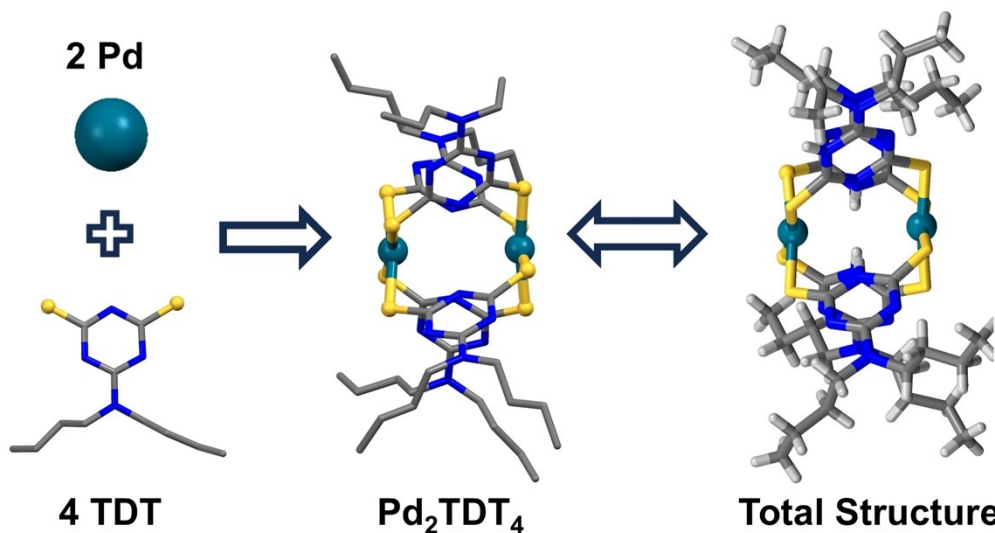

**Figure S9.** Structural analysis of the Pd<sub>2</sub>TDT<sub>4</sub> complex in Pd<sub>1</sub>Au<sub>12</sub> and Pd<sub>2</sub>Au<sub>12</sub>. Taken that the Pd<sub>2</sub>(TDT)<sub>4</sub> complexes in two cluster systems displayed the same structure, we proposed that differences in catalysis originated from the differences of clusters themselves.

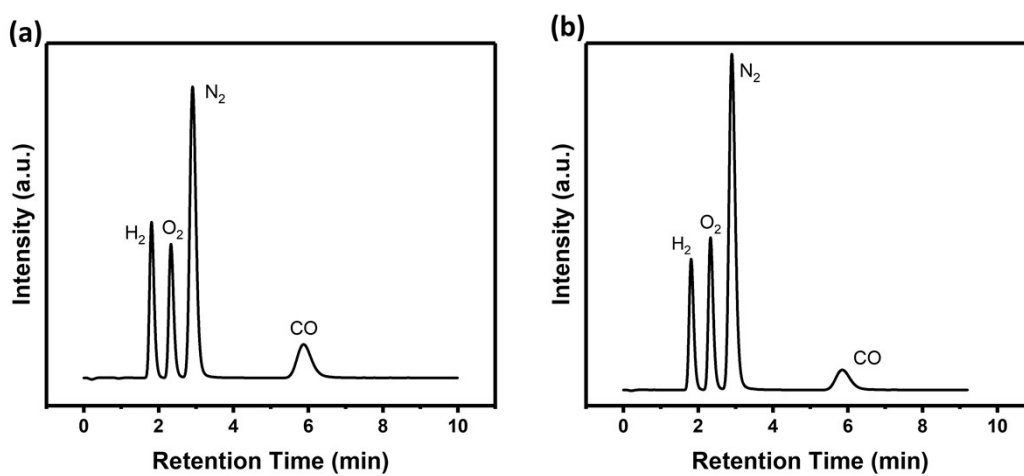

**Figure S10.** GC plots of (a) Pd<sub>1</sub>Au<sub>12</sub> and (b) Pd<sub>2</sub>Au<sub>12</sub> tested at -0.7 V vs RHE.



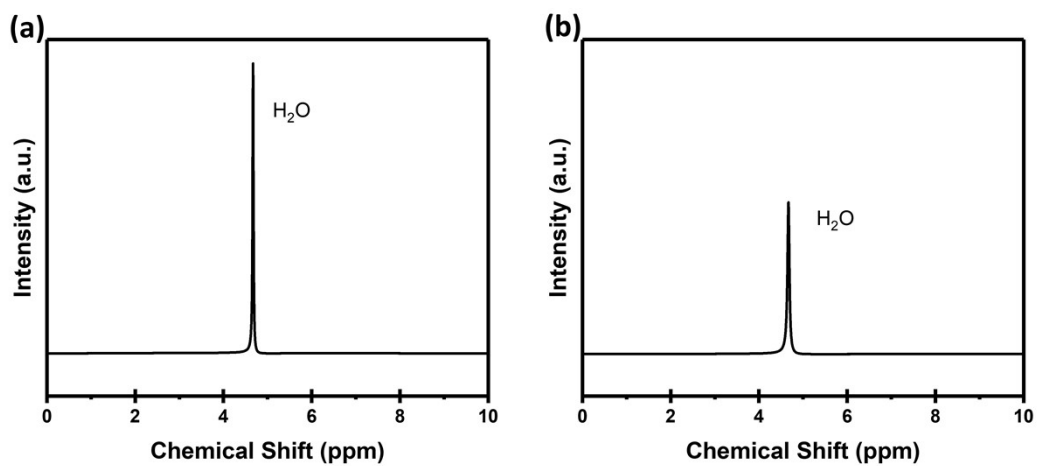

Figure S11.  $^1\text{H}$  NMR spectrum of the electrolyte after  $\text{CO}_2\text{RR}$  electrolysis by using (a)  $\text{Pd}_1\text{Au}_{12}$  and (b)  $\text{Pd}_2\text{Au}_{12}$ .

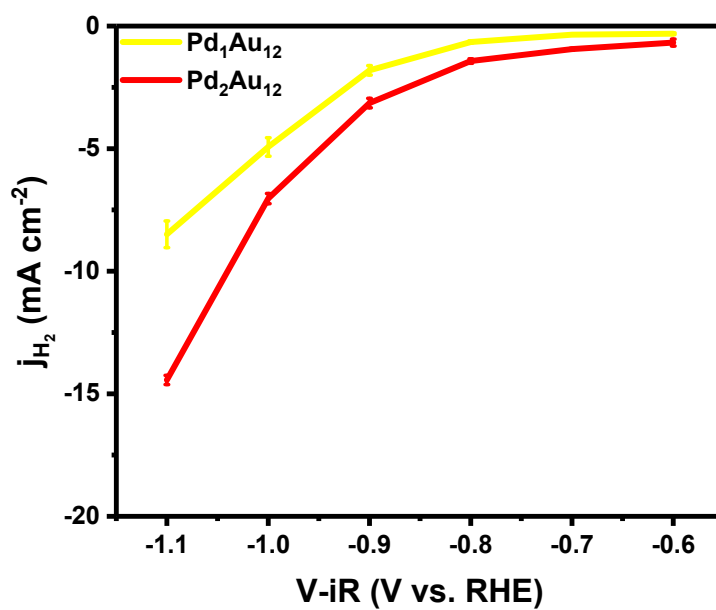

Figure S12.  $\text{H}_2$  partial current density ( $j_{\text{H}_2}$ ) of  $\text{Pd}_1\text{Au}_{12}$  and  $\text{Pd}_2\text{Au}_{12}$ .

**Table S1.** Crystal data and structure refinement of **Pd<sub>1</sub>Au<sub>12</sub>**.

|                                         |                                                                        |
|-----------------------------------------|------------------------------------------------------------------------|
| Crystal system                          | monoclinic                                                             |
| Space group                             | P2 <sub>1</sub> /n                                                     |
| a/Å                                     | 17.130                                                                 |
| b/Å                                     | 53.449                                                                 |
| c/Å                                     | 17.415                                                                 |
| $\alpha$ /°                             | 90                                                                     |
| $\beta$ /°                              | 90.68                                                                  |
| $\gamma$ /°                             | 90                                                                     |
| Volume/Å <sup>3</sup>                   | 15943.8                                                                |
| Z                                       | 2                                                                      |
| $\rho$ calcg/cm <sup>3</sup>            | 1.574                                                                  |
| $\mu$ /mm <sup>-1</sup>                 | 14.290                                                                 |
| F(000)                                  | 7504.0                                                                 |
| Radiation                               | Cu Ka ( $\lambda$ = 1.54186)                                           |
| Index ranges                            | -14 $\leq$ h $\leq$ 19, -61 $\leq$ k $\leq$ 54, -19 $\leq$ l $\leq$ 19 |
| Final R indexes [ $I \geq 2\sigma(I)$ ] | R <sub>1</sub> = 0.0692 wR <sub>2</sub> = 0.1886                       |
| Final R indexes [all data]              | R <sub>1</sub> = 0.0818, wR <sub>2</sub> = 0.1983                      |

**Table S2.** Crystal data and structure refinement of **Pd<sub>2</sub>Au<sub>12</sub>**.

|                                         |                                                                        |
|-----------------------------------------|------------------------------------------------------------------------|
| Crystal system                          | triclinic                                                              |
| Space group                             | P-1                                                                    |
| a/Å                                     | 16.7465(5)                                                             |
| b/Å                                     | 17.5624(5)                                                             |
| c/Å                                     | 26.3391(7)                                                             |
| $\alpha$ /°                             | 99.096(2)                                                              |
| $\beta$ /°                              | 90.215(2)                                                              |
| $\gamma$ /°                             | 91.009(2)                                                              |
| Volume/Å <sup>3</sup>                   | 7647.8(4)                                                              |
| Z                                       | 2                                                                      |
| $\rho$ calc/cm <sup>3</sup>             | 1.678                                                                  |
| $\mu$ /mm <sup>-1</sup>                 | 15.349                                                                 |
| F(000)                                  | 3730.0                                                                 |
| Radiation                               | Cu Ka ( $\lambda$ = 1.54186)                                           |
| Index ranges                            | -14 $\leq$ h $\leq$ 19, -62 $\leq$ k $\leq$ 54, -20 $\leq$ l $\leq$ 20 |
| Final R indexes [ $I \geq 2\sigma(I)$ ] | R <sub>1</sub> = 0.0651, wR <sub>2</sub> = 0.1811                      |
| Final R indexes [all data]              | R <sub>1</sub> = 0.0766, wR <sub>2</sub> = 0.1908                      |

**Table S3.** Comparison of the bond lengths between **Pd<sub>1</sub>Au<sub>12</sub>** and **Pd<sub>2</sub>Au<sub>12</sub>** nanoclusters.

| Cluster                              | $D_{Pd-Pd}$ | $D_{Pd-Au}$                    | $D_{Au-Au}$                    |
|--------------------------------------|-------------|--------------------------------|--------------------------------|
| <b>Pd<sub>1</sub>Au<sub>12</sub></b> | -           | 2.72 Å - 2.80Å<br>Ave: 2.77 Å  | 2.81 Å - 3.07 Å<br>Ave: 2.91 Å |
| <b>Pd<sub>2</sub>Au<sub>12</sub></b> | 2.61 Å      | 2.59 Å - 2.79 Å<br>Ave: 2.71 Å | 2.65 Å - 2.93 Å<br>Ave: 2.84 Å |
